## BOOK REVIEW

### *Detailed Atlas of the Head and Neck.*

By RAYMOND C. TRUAX and CARL E. KELLNER, College of Physicians and Surgeons, Columbia University. Price \$15.00. Pp. 162. 136 plates. New York, Oxford University Press, 1948.

This volume contains material of great interest to anesthesiologists. The majority of its value lies in accurate, pleasing presentations of the anatomy of the anterior and posterior cervical nerves, the brachial plexus, the upper thoracic and cervical sympathetic nerves, the intracranial contents, and the nerve supply of the eye, nose, mouth and throat. There are splendid plates of the larynx.

The authors, one an anatomist, the other an artist, have endeavored to offer a three-dimensional approach to

their subject. With this end in view there are series of deeper and deeper dissections; there are frontal and transverse sections and orientation is facilitated thereby.

The format of the book is attractive. Two possible criticisms come to mind. First, the size of the volume exceeds that of the ordinary library shelf. Second, some of the identifying lines of anatomic structures approach the end of the page too closely.

Whether the material presented and the method of approach utilized are sufficiently superior to those of the older atlases of anatomy is a matter for the individual reader to decide. The reviewer was stimulated to a new interest in the anatomy of the "closely packed regions of the head and neck."

ROBERT D. DRIPPS, M.D.
